# Supplementary material for: Hepatic Mitochondrial Dysfunction and Risk of Liver Disease in an Ovine Model of “PCOS Males”
Source: MDPI journal article supplement (doi:10.3390/biomedicines10061291), 2022-05-31
Supplement: s1 [file s1]

## Supplementary Tables

**Table S1.** Forward and reverse primer sequences for genes analysed in the fetal and postnatal hepatic samples using qPCR and qRT-PCR.

| Gene           | Forward Sequence         | Reverse Sequence       |
|----------------|--------------------------|------------------------|
| <i>MT-ND1</i>  | CAACGTTCTAACACTCATCATTCC | GGGTCGTAGGGGTTCTTTGA   |
| <i>MT-ND2</i>  | AATTGCCACATAGGCTGAA      | GGGGGAAGTCCTCCTATTGA   |
| <i>MT-ND6</i>  | GGGGGTATGATGGTAGTTTTTG   | AACCCAGAATCCCCCGTAT    |
| <i>RPS11</i>   | ATCCGCCGAGACTACCTTCA     | CCTGAAGCAGGGAGAAAGGT   |
| <i>RPS25</i>   | CCTCACCCCAGGACAGTTTC     | CAGCATGGGGAAAGTGGGAT   |
| <i>NDUFA7</i>  | CGCCCTCGATTGTCATGTCT     | CCCCCAGCCAAAGTCATAGG   |
| <i>NDUFA12</i> | TCTGGGATGTGGATGGAAGC     | TACGTACTGTTGTGGAGTGCC  |
| <i>NDUFB4</i>  | GAAGATCCTGCCTTGATTCTG    | CAATTCCGAACAGAGCTCCTA  |
| <i>CYCS</i>    | GGTGATGTTGAGAAAGGCAAG    | TTGTTTTTGTGGCATCTGTG   |
| <i>UQCRB</i>   | AACGCTTCTGTGTCAGGTCA     | AACCCGGCAGCGTTGTAATA   |
| <i>UQCRC1</i>  | AAAACCTCCTCCGAAACGCT     | CCGTATGTCAGGAGACTGCG   |
| <i>COX5A</i>   | CGCTGGGTGACATACTTCAA     | GATGCGAACTGCACTAGCAA   |
| <i>COX6B1</i>  | CCAGACTGCTCCTTTTGACA     | GATATGGGGCAAAGGGACTT   |
| <i>COX7B</i>   | AGATTGGCATAACAGTGGGGC    | TGAGCAGCAGAGTGCTTAAAGA |
| <i>ATP5IF1</i> | CTCGGAATCGGGAGATAGTG     | GGAAGTATCGCTCCTCTTCG   |
| <i>ATP5MC3</i> | GCTGTCCCGAAGAGTGCAAG     | CGCAGTGGTCTGAAACTCCC   |
| <i>ATP5PO</i>  | GACTCGGGTTTGACCTACAG     | AAGAGCTGAGGCATAGCGAC   |

**Table S2.** Differentially expressed hepatic genes and proteins relevant to TCA cycle and OXPHOS in adolescent prenatally androgenized males as compared with adolescent male controls.

| Gene ID          | Template | Detection technique | Fold change | P Value | Q Value |
|------------------|----------|---------------------|-------------|---------|---------|
| <b>TCA cycle</b> |          |                     |             |         |         |
| CS               | mRNA     | RNAseq              | -1.43       | 0.00    | 0.00    |
| CS               | protein  | Proteomics          | -1.12       | 0.06    | 0.35    |
| ACO2             | protein  | Proteomics          | -1.37       | 0.01    | 0.14    |
| IDH2             | mRNA     | RNAseq              | -1.29       | 0.01    | 0.07    |
| IDH2             | protein  | Proteomics          | -1.13       | 0.14    | 0.49    |
| IDH3A            | mRNA     | RNAseq              | -1.15       | 0.04    | 0.20    |
| OGDH             | mRNA     | RNAseq              | -1.16       | 0.00    | 0.05    |
| OGDH             | protein  | Proteomics          | -1.24       | 0.00    | 0.14    |
| SUCLG1           | mRNA     | RNAseq              | -1.13       | 0.00    | 0.04    |
| SUCLA2           | mRNA     | RNAseq              | -1.14       | 0.03    | 0.17    |
| SUCLA2           | protein  | Proteomics          | -1.51       | 0.18    | 0.53    |
| SDHA             | mRNA     | RNAseq              | -1.03       | 0.59    | 0.80    |
| SDHA             | protein  | Proteomics          | -1.62       | 0.02    | 0.22    |
| SDHB             | mRNA     | RNAseq              | -1.12       | 0.33    | 0.61    |
| SDHB             | protein  | Proteomics          | -1.17       | 0.02    | 0.24    |
| SDHC             | mRNA     | RNAseq              | -1.09       | 0.08    | 0.28    |
| SDHC             | protein  | Proteomics          | -1.31       | 0.38    | 0.72    |
| SDHD             | mRNA     | RNAseq              | -1.11       | 0.01    | 0.10    |
| MDH2             | mRNA     | RNAseq              | -1.09       | 0.04    | 0.19    |
| MDH2             | protein  | Proteomics          | -1.15       | 0.04    | 0.32    |

| <b>OXPHOS Complex I</b>   |         |            |       |      |      |
|---------------------------|---------|------------|-------|------|------|
| <i>NDUFA1</i>             | mRNA    | RNAseq     | -1.11 | 0.03 | 0.17 |
| <i>NDUFA12</i>            | mRNA    | RNAseq     | -1.19 | 0.00 | 0.01 |
| <i>NDUFA2</i>             | mRNA    | RNAseq     | -1.13 | 0.02 | 0.14 |
| <i>NDUFA2</i>             | protein | Proteomics | -1.18 | 0.22 | 0.58 |
| <i>NDUFA4</i>             | mRNA    | RNAseq     | -1.20 | 0.00 | 0.03 |
| <i>NDUFA4</i>             | protein | Proteomics | -1.14 | 0.08 | 0.42 |
| <i>NDUFA5</i>             | mRNA    | RNAseq     | -1.27 | 0.00 | 0.02 |
| <i>NDUFA7</i>             | mRNA    | RNAseq     | -1.25 | 0.00 | 0.03 |
| <i>NDUFA7</i>             | protein | Proteomics | -1.81 | 0.03 | 0.28 |
| <i>NDUFA9</i>             | mRNA    | RNAseq     | -1.10 | 0.01 | 0.07 |
| <i>NDUFA9</i>             | protein | Proteomics | -1.20 | 0.02 | 0.22 |
| <i>NDUFAB1</i>            | mRNA    | RNAseq     | -1.19 | 0.00 | 0.01 |
| <i>NDUFB1</i>             | mRNA    | RNAseq     | -1.14 | 0.01 | 0.09 |
| <i>NDUFB10</i>            | mRNA    | RNAseq     | -1.12 | 0.02 | 0.14 |
| <i>NDUFB11</i>            | mRNA    | RNAseq     | -1.13 | 0.01 | 0.09 |
| <i>NDUFB3</i>             | mRNA    | RNAseq     | -1.22 | 0.00 | 0.01 |
| <i>NDUFB4</i>             | mRNA    | RNAseq     | -1.21 | 0.00 | 0.00 |
| <i>NDUFB5</i>             | mRNA    | RNAseq     | -1.16 | 0.00 | 0.02 |
| <i>NDUFB6</i>             | mRNA    | RNAseq     | -1.14 | 0.01 | 0.08 |
| <i>NDUFB8</i>             | mRNA    | RNAseq     | -1.11 | 0.01 | 0.07 |
| <i>NDUFB9</i>             | mRNA    | RNAseq     | -1.15 | 0.00 | 0.04 |
| <i>NDUFB9</i>             | protein | Proteomics | -1.15 | 0.05 | 0.34 |
| <i>NDUFC1</i>             | mRNA    | RNAseq     | -1.11 | 0.01 | 0.10 |
| <i>NDUFC2</i>             | mRNA    | RNAseq     | -1.13 | 0.02 | 0.12 |
| <i>NDUFS3</i>             | mRNA    | RNAseq     | -1.17 | 0.00 | 0.01 |
| <i>NDUFS4</i>             | mRNA    | RNAseq     | -1.16 | 0.00 | 0.03 |
| <i>NDUFS7</i>             | mRNA    | RNAseq     | -1.13 | 0.03 | 0.16 |
| <i>NDUFS8</i>             | mRNA    | RNAseq     | -1.15 | 0.00 | 0.03 |
| <i>NDUFS8</i>             | protein | Proteomics | -1.15 | 0.03 | 0.28 |
| <i>NDUFV2</i>             | mRNA    | RNAseq     | -1.24 | 0.00 | 0.00 |
| <b>OXPHOS Complex III</b> |         |            |       |      |      |
| <i>CYC1</i>               | mRNA    | RNAseq     | -1.16 | 0.01 | 0.07 |
| <i>CYC1</i>               | protein | Proteomics | -1.25 | 0.01 | 0.14 |
| <i>CYCS</i>               | mRNA    | RNAseq     | -1.23 | 0.00 | 0.05 |
| <i>UQCRB</i>              | mRNA    | RNAseq     | -1.26 | 0.00 | 0.00 |
| <i>UQCRC1</i>             | mRNA    | RNAseq     | -1.15 | 0.01 | 0.07 |
| <i>UQCRC2</i>             | mRNA    | RNAseq     | -1.12 | 0.01 | 0.10 |
| <i>UQCRC2</i>             | protein | Proteomics | -1.14 | 0.05 | 0.33 |
| <i>UQCRFS1</i>            | mRNA    | RNAseq     | -1.12 | 0.02 | 0.13 |
| <i>UQCRH</i>              | mRNA    | RNAseq     | -1.20 | 0.00 | 0.01 |
| <b>OXPHOS Complex IV</b>  |         |            |       |      |      |
| <i>MT-CO1</i>             | mRNA    | RNAseq     | -1.15 | 0.03 | 0.17 |
| <i>MT-CO2</i>             | mRNA    | RNAseq     | -1.20 | 0.01 | 0.09 |
| <i>MT-CO2</i>             | protein | Proteomics | -1.38 | 0.10 | 0.44 |
| <i>COX4I1</i>             | mRNA    | RNAseq     | -1.08 | 0.03 | 0.17 |
| <i>COX5A</i>              | mRNA    | RNAseq     | -1.30 | 0.00 | 0.00 |
| <i>COX5B</i>              | mRNA    | RNAseq     | -1.14 | 0.00 | 0.06 |
| <i>COX6B1</i>             | mRNA    | RNAseq     | -1.12 | 0.00 | 0.05 |
| <i>COX6C</i>              | mRNA    | RNAseq     | -1.15 | 0.00 | 0.03 |
| <i>COX7A1</i>             | mRNA    | RNAseq     | -1.64 | 0.02 | 0.13 |
| <i>COX7A2</i>             | mRNA    | RNAseq     | -1.12 | 0.02 | 0.14 |
| <i>COX7B</i>              | mRNA    | RNAseq     | -1.19 | 0.00 | 0.03 |

| OXPHOS Complex V |         |            |       |      |      |
|------------------|---------|------------|-------|------|------|
| <i>MT-ATP8</i>   | mRNA    | RNAseq     | -1.18 | 0.03 | 0.16 |
| <i>MT-ATP8</i>   | protein | Proteomics | -1.23 | 0.57 | 0.83 |
| <i>ATP5F1A</i>   | mRNA    | RNAseq     | -1.11 | 0.03 | 0.17 |
| <i>ATP5F1A</i>   | protein | Proteomics | -1.10 | 0.11 | 0.45 |
| <i>ATP5F1B</i>   | mRNA    | RNAseq     | -1.12 | 0.01 | 0.07 |
| <i>ATP5F1C</i>   | mRNA    | RNAseq     | -1.15 | 0.00 | 0.04 |
| <i>ATP5F1E</i>   | mRNA    | RNAseq     | -1.12 | 0.02 | 0.13 |
| <i>ATP5F1E</i>   | protein | Proteomics | -1.14 | 0.37 | 0.71 |
| <i>ATP5IF1</i>   | mRNA    | RNAseq     | -1.17 | 0.00 | 0.01 |
| <i>ATP5MC1</i>   | mRNA    | RNAseq     | -1.17 | 0.01 | 0.09 |
| <i>ATP5MC3</i>   | mRNA    | RNAseq     | -1.19 | 0.00 | 0.02 |
| <i>ATP5MD</i>    | mRNA    | RNAseq     | -1.18 | 0.00 | 0.03 |
| <i>ATP5MF</i>    | mRNA    | RNAseq     | -1.11 | 0.03 | 0.17 |
| <i>ATP5MF</i>    | protein | Proteomics | -1.41 | 0.13 | 0.48 |
| <i>ATP5MG</i>    | mRNA    | RNAseq     | -1.11 | 0.00 | 0.05 |
| <i>ATP5PB</i>    | mRNA    | RNAseq     | -1.10 | 0.03 | 0.17 |
| <i>ATP5PD</i>    | mRNA    | RNAseq     | -1.09 | 0.04 | 0.18 |
| <i>ATP5PD</i>    | protein | Proteomics | -1.10 | 0.28 | 0.64 |
| <i>ATP5PF</i>    | mRNA    | RNAseq     | -1.11 | 0.03 | 0.17 |
| <i>ATP5PF</i>    | protein | Proteomics | -1.12 | 0.41 | 0.73 |
| <i>ATP5PO</i>    | mRNA    | RNAseq     | -1.13 | 0.01 | 0.09 |
| <i>ATP5PO</i>    | protein | Proteomics | -1.14 | 0.09 | 0.43 |

Fold change is PA compared to control animals. P values cited are nominal values, false discovery rate adjusted Q values were calculated by Benjamini and Hochberg method.

**Table S3.** Correlation between hepatic ATP levels and OXPHOS genes in adolescent control and prenatally androgenized males.

| OXPHOS         | Correlation with hepatic ATP |         |
|----------------|------------------------------|---------|
| Gene ID        | Pearson r                    | P value |
| <i>NDUFA1</i>  | 0.31                         | 0.06    |
| <i>NDUFA4</i>  | 0.38                         | 0.03    |
| <i>NDUFA12</i> | 0.27                         | 0.09    |
| <i>NDUFAB1</i> | 0.46                         | 0.01    |
| <i>NDUFB3</i>  | 0.31                         | 0.06    |
| <i>NDUFB4</i>  | 0.37                         | 0.03    |
| <i>NDUFB10</i> | 0.31                         | 0.06    |
| <i>NDUFA9</i>  | 0.56                         | 0.00    |
| <i>NDUFB5</i>  | 0.36                         | 0.04    |
| <i>NDUFB11</i> | 0.31                         | 0.06    |
| <i>NDUFC1</i>  | 0.28                         | 0.08    |
| <i>NDUFS4</i>  | 0.39                         | 0.02    |
| <i>NDUFS7</i>  | 0.42                         | 0.02    |
| <i>NDUFV2</i>  | 0.30                         | 0.07    |
| <i>UQCRB</i>   | 0.27                         | 0.09    |
| <i>UQCRC2</i>  | 0.37                         | 0.03    |
| <i>UQCRFS1</i> | 0.35                         | 0.04    |
| <i>COX5A</i>   | 0.27                         | 0.09    |
| <i>COX5B</i>   | 0.33                         | 0.05    |
| <i>COX7B</i>   | 0.35                         | 0.04    |
| <i>ATP5F1B</i> | 0.27                         | 0.09    |
| <i>ATP5MC1</i> | 0.32                         | 0.05    |
| <i>ATP5MD</i>  | 0.32                         | 0.06    |

|               |      |      |
|---------------|------|------|
| <i>ATP5MG</i> | 0.36 | 0.04 |
| <i>ATP5PD</i> | 0.39 | 0.02 |
| <i>ATP5PF</i> | 0.30 | 0.07 |
| <i>ATP5PO</i> | 0.40 | 0.02 |

**Table S4.** Differentially expressed genes and proteins relevant to hepatic fatty acid and cholesterol metabolism in adolescent prenatally androgenized males as compared with adolescent male controls.

| Gene ID                                                    | Template | Detection technique | Fold change | P value | Q Value |
|------------------------------------------------------------|----------|---------------------|-------------|---------|---------|
| <b>Hepatic FA uptake and trafficking</b>                   |          |                     |             |         |         |
| <i>CD36</i>                                                | mRNA     | RNAseq              | 1.26        | 0.11    | 0.34    |
| <i>SLC27A5</i>                                             | mRNA     | RNAseq              | 1.11        | 0.06    | 0.23    |
| <i>SLC27A5</i>                                             | protein  | Proteomics          | 1.29        | 0.00    | 0.12    |
| <i>FABP5</i>                                               | mRNA     | RNAseq              | 1.40        | 0.04    | 0.19    |
| <b>Mitochondrial uptake of FA</b>                          |          |                     |             |         |         |
| <i>CPT1A</i>                                               | mRNA     | RNAseq              | 1.33        | 0.00    | 0.01    |
| <i>CPT1A</i>                                               | protein  | Proteomics          | 1.22        | 0.01    | 0.14    |
| <i>CPT1B</i>                                               | mRNA     | RNAseq              | 1.42        | 0.00    | 0.01    |
| <i>SLC25A20</i>                                            | mRNA     | RNAseq              | 1.16        | 0.09    | 0.30    |
| <i>CPT2</i>                                                | mRNA     | RNAseq              | 1.15        | 0.01    | 0.09    |
| <i>CPT2</i>                                                | protein  | Proteomics          | 1.76        | 0.10    | 0.44    |
| <i>CRAT</i>                                                | mRNA     | RNAseq              | 1.17        | 0.01    | 0.09    |
| <b>Fatty acid activation</b>                               |          |                     |             |         |         |
| <i>ACSS2</i>                                               | mRNA     | RNAseq              | -2.03       | 0.00    | 0.02    |
| <i>ACSS2</i>                                               | protein  | Proteomics          | -1.32       | 0.48    | 0.79    |
| <i>ACSL3</i>                                               | mRNA     | RNAseq              | -1.44       | 0.00    | 0.01    |
| <i>ACSL5</i>                                               | mRNA     | RNAseq              | -1.19       | 0.02    | 0.11    |
| <i>ACSL5</i>                                               | protein  | Proteomics          | -1.23       | 0.00    | 0.13    |
| <b>Mitochondrial beta oxidation</b>                        |          |                     |             |         |         |
| <i>ACADSB</i>                                              | mRNA     | RNAseq              | -1.25       | 0.00    | 0.05    |
| <i>ACADSB</i>                                              | protein  | Proteomics          | -1.19       | 0.02    | 0.25    |
| <i>ECHS1</i>                                               | mRNA     | RNAseq              | -1.17       | 0.01    | 0.09    |
| <i>ECHS1</i>                                               | protein  | Proteomics          | -1.16       | 0.02    | 0.24    |
| <i>DECR1</i>                                               | mRNA     | RNAseq              | -1.22       | 0.00    | 0.06    |
| <i>DECR1</i>                                               | protein  | Proteomics          | -1.14       | 0.07    | 0.39    |
| <b>Peroxisomal beta oxidation</b>                          |          |                     |             |         |         |
| <i>ACOX2</i>                                               | protein  | Proteomics          | 5.02        | 0.00    | 0.08    |
| <i>EHHADH</i>                                              | protein  | Proteomics          | 3.53        | 0.00    | 0.10    |
| <i>ACAA1</i>                                               | protein  | Proteomics          | 1.57        | 0.00    | 0.07    |
| <i>CROT</i>                                                | mRNA     | RNAseq              | 1.19        | 0.02    | 0.11    |
| <b>Hepatic FA lipogenesis, elongation and desaturation</b> |          |                     |             |         |         |
| <i>MLYCD</i>                                               | mRNA     | RNAseq              | 1.2         | 0.00    | 0.06    |
| <i>ACLY</i>                                                | mRNA     | RNAseq              | -1.9        | 0.00    | 0.00    |
| <i>ACLY</i>                                                | protein  | Proteomics          | -2.0        | 0.03    | 0.29    |
| <i>ACACA</i>                                               | mRNA     | RNAseq              | -1.8        | 0.00    | 0.01    |
| <i>FASN</i>                                                | mRNA     | RNAseq              | -2.5        | 0.00    | 0.03    |
| <i>FASN</i>                                                | protein  | Proteomics          | -2.5        | 0.04    | 0.32    |
| <i>ELOVL6</i>                                              | mRNA     | RNAseq              | -2.5        | 0.00    | 0.00    |
| <i>SCD</i>                                                 | mRNA     | RNAseq              | -4.3        | 0.00    | 0.00    |
| <b>Cholesterol trafficking and metabolism</b>              |          |                     |             |         |         |
| <i>NPC1</i>                                                | mRNA     | RNAseq              | -1.34       | 0.00    | 0.06    |
| <i>NPC2</i>                                                | mRNA     | RNAseq              | -1.02       | 0.60    | 0.81    |
| <i>SOAT2</i>                                               | mRNA     | RNAseq              | 1.2         | 0.00    | 0.03    |
| <b>Lipid droplet accumulation</b>                          |          |                     |             |         |         |
| <i>PLIN2</i>                                               | mRNA     | RNAseq              | 1.95        | 0.01    | 0.07    |
| <i>PLIN5</i>                                               | mRNA     | RNAseq              | 1.27        | 0.00    | 0.03    |

Fold change is PA compared to control animals. P values cited are nominal values, false discovery rate adjusted Q values were calculated by Benjamini and Hochberg method.

**Table S5.** Differentially expressed genes and proteins relevant to hepatic glucose metabolism in adolescent prenatally androgenized males as compared with adolescent male controls.

| Gene ID                               | Template | Detection technique | Fold change | P value | Q Value |
|---------------------------------------|----------|---------------------|-------------|---------|---------|
| <b>Glycolysis</b>                     |          |                     |             |         |         |
| <i>HK1</i>                            | mRNA     | RNAseq              | 1.01        | 0.87    | 0.95    |
| <i>HK2</i>                            | mRNA     | RNAseq              | -1.09       | 0.11    | 0.34    |
| <i>HK3</i>                            | mRNA     | RNAseq              | -1.04       | 0.73    | 0.88    |
| <i>PFKL</i>                           | mRNA     | RNAseq              | -1.09       | 0.37    | 0.65    |
| <i>PFKL</i>                           | protein  | Proteomics          | -1.28       | 0.01    | 0.14    |
| <i>PKLR</i>                           | mRNA     | RNAseq              | -1.05       | 0.43    | 0.69    |
| <i>PKLR</i>                           | protein  | Proteomics          | -1.33       | 0.03    | 0.28    |
| <b>Pyruvate transport</b>             |          |                     |             |         |         |
| <i>MPC1</i>                           | mRNA     | RNAseq              | 1.26        | 0.01    | 0.06    |
| <i>MPC2</i>                           | mRNA     | RNAseq              | -1.05       | 0.34    | 0.62    |
| <b>Pyruvate dehydrogenase complex</b> |          |                     |             |         |         |
| <i>PDHA1</i>                          | mRNA     | RNAseq              | -1.09       | 0.15    | 0.40    |
| <i>PDHA1</i>                          | protein  | Proteomics          | -1.42       | 0.00    | 0.08    |
| <i>PDHB</i>                           | mRNA     | RNAseq              | -1.10       | 0.04    | 0.19    |
| <i>DLAT</i>                           | mRNA     | RNAseq              | -1.14       | 0.00    | 0.03    |
| <i>DLAT</i>                           | protein  | Proteomics          | -1.33       | 0.03    | 0.29    |
| <b>PDHC kinases</b>                   |          |                     |             |         |         |
| <i>PDK1</i>                           | mRNA     | RNAseq              | 1.01        | 0.88    | 0.95    |
| <i>PDK2</i>                           | mRNA     | RNAseq              | 1.04        | 0.37    | 0.65    |
| <i>PDK3</i>                           | mRNA     | RNAseq              | -1.10       | 0.17    | 0.42    |
| <i>PDK4</i>                           | mRNA     | RNAseq              | 1.55        | 0.00    | 0.01    |
| <b>Gluconeogenesis</b>                |          |                     |             |         |         |
| <i>PC</i>                             | mRNA     | RNAseq              | 1.82        | 0.00    | 0.01    |
| <i>PC</i>                             | protein  | Proteomics          | 1.17        | 0.16    | 0.52    |
| <i>PCK1</i>                           | mRNA     | RNAseq              | 1.12        | 0.18    | 0.44    |
| <i>FBP1</i>                           | mRNA     | RNAseq              | 1.03        | 0.73    | 0.88    |
| <i>FBP1</i>                           | protein  | Proteomics          | 1.13        | 0.07    | 0.38    |
| <i>FBP2</i>                           | mRNA     | RNAseq              | 1.54        | 0.01    | 0.09    |
| <i>G6PC2</i>                          | mRNA     | RNAseq              | 1.21        | 0.08    | 0.28    |
| <b>Glycogen synthesis</b>             |          |                     |             |         |         |
| <i>GYS2</i>                           | mRNA     | RNAseq              | 1.21        | 0.01    | 0.11    |

Fold change is PA compared to control animals. P values cited are nominal values, false discovery rate adjusted Q values were calculated by Benjamini and Hochberg method.

**Table S6.** Correlation between hepatic free cholesterol levels and OXPHOS genes in adolescent control and prenatally androgenized males.

| OXPHOS           | Correlation with hepatic free cholesterol |         |
|------------------|-------------------------------------------|---------|
|                  | Pearson r                                 | P value |
| <b>Complex I</b> |                                           |         |
| <i>NDUFA1</i>    | -0.27                                     | 0.16    |
| <i>NDUFA2</i>    | -0.16                                     | 0.41    |
| <i>NDUFA4</i>    | -0.32                                     | 0.09    |
| <i>NDUFA5</i>    | -0.48                                     | 0.01    |
| <i>NDUFA7</i>    | -0.28                                     | 0.14    |
| <i>NDUFA9</i>    | -0.44                                     | 0.01    |
| <i>NDUFA12</i>   | -0.39                                     | 0.03    |
| <i>NDUFAB1</i>   | -0.49                                     | 0.00    |
| <i>NDUFB1</i>    | -0.14                                     | 0.47    |

|                    |       |      |
|--------------------|-------|------|
| <i>NDUFB3</i>      | -0.42 | 0.02 |
| <i>NDUFB4</i>      | -0.33 | 0.08 |
| <i>NDUFB5</i>      | -0.39 | 0.04 |
| <i>NDUFB6</i>      | -0.39 | 0.04 |
| <i>NDUFB8</i>      | -0.30 | 0.12 |
| <i>NDUFB9</i>      | -0.41 | 0.03 |
| <i>NDUFB10</i>     | -0.42 | 0.02 |
| <i>NDUFB11</i>     | -0.24 | 0.22 |
| <i>NDUFC1</i>      | -0.25 | 0.20 |
| <i>NDUFC2</i>      | -0.29 | 0.13 |
| <i>NDUFS3</i>      | -0.44 | 0.01 |
| <i>NDUFS4</i>      | -0.41 | 0.02 |
| <i>NDUFS7</i>      | -0.15 | 0.45 |
| <i>NDUFS8</i>      | -0.26 | 0.17 |
| <i>NDUFV2</i>      | -0.46 | 0.01 |
| <b>Complex III</b> |       |      |
| <i>CYC1</i>        | -0.31 | 0.10 |
| <i>CYCS</i>        | -0.31 | 0.10 |
| <i>UQCRB</i>       | -0.44 | 0.02 |
| <i>UQCRC1</i>      | -0.30 | 0.11 |
| <i>UQCRC2</i>      | -0.21 | 0.27 |
| <i>UQCRFS1</i>     | -0.33 | 0.08 |
| <i>UQCRH</i>       | -0.32 | 0.09 |
| <b>Complex IV</b>  |       |      |
| <i>MT-CO2</i>      | -0.13 | 0.5  |
| <i>COX5A</i>       | -0.39 | 0.03 |
| <i>COX5B</i>       | -0.25 | 0.21 |
| <i>COX6B1</i>      | -0.35 | 0.07 |
| <i>COX6C</i>       | -0.35 | 0.06 |
| <i>COX7B</i>       | -0.42 | 0.02 |
| <b>Complex V</b>   |       |      |
| <i>MT-ATP8</i>     | -0.33 | 0.08 |
| <i>ATP5F1A</i>     | -0.29 | 0.13 |
| <i>ATP5F1B</i>     | -0.18 | 0.34 |
| <i>ATP5F1E</i>     | -0.29 | 0.13 |
| <i>ATP5F1C</i>     | -0.35 | 0.06 |
| <i>ATP5IF1</i>     | -0.44 | 0.01 |
| <i>ATP5MC1</i>     | -0.20 | 0.29 |
| <i>ATP5MC3</i>     | -0.28 | 0.10 |
| <i>ATP5MD</i>      | -0.36 | 0.05 |
| <i>ATP5MF</i>      | -0.39 | 0.03 |
| <i>ATP5MG</i>      | -0.45 | 0.01 |
| <i>ATP5PF</i>      | -0.38 | 0.04 |
| <i>ATP5PD</i>      | -0.37 | 0.05 |
| <i>ATP5PO</i>      | -0.39 | 0.04 |

**Table S7.** Differentially expressed genes and proteins relevant to hepatic mitochondrial transporters, translocases and channels in adolescent prenatally androgenized males as compared with adolescent male controls.

| Gene ID                                               | Template | Detection technique | Fold change | P value | Q Value |
|-------------------------------------------------------|----------|---------------------|-------------|---------|---------|
| Mitochondrial transporters, translocases and channels |          |                     |             |         |         |
| <i>CLIC2</i>                                          | mRNA     | RNAseq              | -1.33       | 0.00    | 0.05    |
| <i>SFXN3</i>                                          | mRNA     | RNAseq              | -1.34       | 0.02    | 0.12    |
| <i>SLC25A3</i>                                        | mRNA     | RNAseq              | -1.13       | 0.00    | 0.01    |
| <i>SLC25A5</i>                                        | mRNA     | RNAseq              | -1.28       | 0.00    | 0.03    |

|                 |         |            |       |      |      |
|-----------------|---------|------------|-------|------|------|
| <i>SLC25A11</i> | mRNA    | RNAseq     | -1.11 | 0.02 | 0.13 |
| <i>SLC25A12</i> | mRNA    | RNAseq     | -1.24 | 0.01 | 0.06 |
| <i>SLC25A17</i> | mRNA    | RNAseq     | -1.10 | 0.03 | 0.15 |
| <i>SLC25A25</i> | mRNA    | RNAseq     | 1.31  | 0.02 | 0.13 |
| <i>SLC25A29</i> | mRNA    | RNAseq     | 1.39  | 0.00 | 0.02 |
| <i>SLC25A30</i> | mRNA    | RNAseq     | 1.95  | 0.00 | 0.02 |
| <i>SLC25A32</i> | mRNA    | RNAseq     | 1.11  | 0.02 | 0.14 |
| <i>SLC25A34</i> | mRNA    | RNAseq     | 1.52  | 0.00 | 0.00 |
| <i>SLC25A35</i> | mRNA    | RNAseq     | -1.40 | 0.00 | 0.01 |
| <i>SLC25A42</i> | mRNA    | RNAseq     | 1.36  | 0.00 | 0.01 |
| <i>SLC25A44</i> | mRNA    | RNAseq     | 1.12  | 0.01 | 0.10 |
| <i>SLC25A45</i> | mRNA    | RNAseq     | 1.89  | 0.00 | 0.02 |
| <i>SLC25A47</i> | mRNA    | RNAseq     | 1.77  | 0.00 | 0.03 |
| <i>SLC25A48</i> | mRNA    | RNAseq     | 1.25  | 0.00 | 0.02 |
| <i>TIMM8B</i>   | mRNA    | RNAseq     | 1.13  | 0.01 | 0.10 |
| <i>TIMM9</i>    | mRNA    | RNAseq     | -1.23 | 0.00 | 0.01 |
| <i>TIMM21</i>   | mRNA    | RNAseq     | -1.11 | 0.00 | 0.05 |
| <i>TIMM23</i>   | mRNA    | RNAseq     | -1.23 | 0.00 | 0.01 |
| <i>TIMM50</i>   | mRNA    | RNAseq     | -1.19 | 0.00 | 0.01 |
| <i>TIMMDC1</i>  | mRNA    | RNAseq     | -1.15 | 0.00 | 0.02 |
| <i>TOMM5</i>    | mRNA    | RNAseq     | -1.15 | 0.01 | 0.09 |
| <i>TOMM22</i>   | mRNA    | RNAseq     | -1.16 | 0.02 | 0.13 |
| <i>TOMM34</i>   | mRNA    | RNAseq     | -1.21 | 0.02 | 0.14 |
| <i>TOMM40</i>   | mRNA    | RNAseq     | -1.21 | 0.00 | 0.05 |
| <i>TOMM40</i>   | protein | Proteomics | -1.30 | 0.18 | 0.54 |
| <i>TOMM70A</i>  | mRNA    | RNAseq     | -1.08 | 0.02 | 0.12 |
| <i>VDAC2</i>    | mRNA    | RNAseq     | -1.10 | 0.01 | 0.06 |
| <i>VDAC3</i>    | mRNA    | RNAseq     | -1.10 | 0.01 | 0.10 |

Fold change is PA compared to control animals. P values cited are nominal values, false discovery rate adjusted Q values were calculated by Benjamini and Hochberg method.

**Table S8.** Differentially expressed genes and proteins relevant to hepatic mitochondrial quality control in adolescent prenatally androgenized males as compared with adolescent male controls.

| Gene ID                      | Template | Detection technique | Fold change | P value | Q Value |
|------------------------------|----------|---------------------|-------------|---------|---------|
| <b>Mitochondrial Fusion</b>  |          |                     |             |         |         |
| <i>MFN1</i>                  | mRNA     | RNAseq              | 1.0         | 0.57    | 0.79    |
| <i>MFN2</i>                  | mRNA     | RNAseq              | 1.1         | 0.08    | 0.28    |
| <i>OPA1</i>                  | mRNA     | RNAseq              | -1.1        | 0.03    | 0.17    |
| <i>OPA1</i>                  | protein  | Proteomics          | -1.1        | 0.50    | 0.80    |
| <b>Mitochondrial Fission</b> |          |                     |             |         |         |
| <i>DNM1L</i>                 | mRNA     | RNAseq              | -1.2        | 0.00    | 0.03    |
| <i>MTFP1</i>                 | mRNA     | RNAseq              | -1.4        | 0.00    | 0.05    |
| <i>MTFR1</i>                 | mRNA     | RNAseq              | -1.1        | 0.01    | 0.07    |
| <b>Mitophagy</b>             |          |                     |             |         |         |
| <i>CALCOCO2</i>              | mRNA     | RNAseq              | -1.3        | 0.00    | 0.00    |
| <i>FUNDC1</i>                | mRNA     | RNAseq              | -1.1        | 0.00    | 0.04    |
| <i>GABARAPL2</i>             | mRNA     | RNAseq              | -1.1        | 0.00    | 0.01    |
| <i>OPTN</i>                  | mRNA     | RNAseq              | -1.1        | 0.01    | 0.09    |
| <i>PARK2</i>                 | mRNA     | RNAseq              | 1.17        | 0.01    | 0.07    |
| <i>PARK7</i>                 | mRNA     | RNAseq              | -1.16       | 0.00    | 0.01    |
| <i>PHB1</i>                  | mRNA     | RNAseq              | -1.2        | 0.00    | 0.03    |
| <i>PINK1</i>                 | mRNA     | RNAseq              | -1.1        | 0.04    | 0.19    |
| <i>PGAM5</i>                 | mRNA     | RNAseq              | -1.1        | 0.01    | 0.07    |
| <i>RHOT1</i>                 | mRNA     | RNAseq              | -1.1        | 0.00    | 0.03    |

|               |      |        |     |      |      |
|---------------|------|--------|-----|------|------|
| <i>USP30</i>  | mRNA | RNAseq | 1.1 | 0.00 | 0.01 |
| <i>ZNF746</i> | mRNA | RNAseq | 1.1 | 0.01 | 0.08 |

Fold change is PA compared to control animals. P values cited are nominal values, false discovery rate adjusted Q values were calculated by Benjamini and Hochberg method.

**Table S9.** Correlation between ROS levels and hepatic lipid metabolism, detoxification potential and fibrosis effectors in adolescent control and prenatally androgenized males.

| Correlation with hepatic ROS levels   | Pearson r | P value |
|---------------------------------------|-----------|---------|
| <b>Hepatic cholesterol metabolism</b> |           |         |
| Hepatic <i>CYP7A1</i> expression      | -0.42     | 0.03    |
| Hepatic <i>NPC1</i> expression        | -0.41     | 0.04    |
| Hepatic free cholesterol              | 0.36      | 0.06    |
| <b>Mitochondrial FA uptake</b>        |           |         |
| Hepatic <i>CPT1A</i> expression       | 0.54      | 0.00    |
| Hepatic <i>CPT1B</i> expression       | 0.64      | 0.00    |
| <b>Regulation of lipid metabolism</b> |           |         |
| Hepatic <i>PPARA</i> expression       | 0.40      | 0.04    |
| Hepatic <i>NR1I2</i> expression       | 0.69      | 0.00    |
| <b>Liver detoxification potential</b> |           |         |
| Hepatic <i>GSS</i> expression         | -0.38     | 0.05    |
| Hepatic <i>GSTM1</i> expression       | -0.36     | 0.07    |
| Hepatic <i>GSTO1</i> expression       | -0.51     | 0.01    |
| Hepatic <i>GPX4</i> expression        | -0.43     | 0.02    |
| Hepatic <i>GPX7</i> expression        | 0.36      | 0.06    |
| <b>Fibrosis effectors</b>             |           |         |
| Hepatic <i>FGFR2</i> expression       | 0.47      | 0.01    |
| Hepatic <i>FGFR3</i> expression       | 0.42      | 0.03    |
| Hepatic <i>COL4A1</i> expression      | 0.51      | 0.01    |
| Hepatic <i>COL4A2</i> expression      | 0.52      | 0.01    |
| Hepatic <i>COL4A4</i> expression      | 0.33      | 0.09    |
| Hepatic <i>COL18A1</i> expression     | 0.66      | 0.00    |
| Hepatic <i>COL27A1</i> expression     | 0.47      | 0.01    |
